# Supplementary material
Source: PubMed Central journal article supplement (PMC4068523)
Supplement: AAC.02668-14_zac007143000so1.pdf [file AAC.02668-14_zac007143000so1.pdf]

1 **Supplemental figures and tables**

2 **Figure S1A: Far-UV CD spectrum of KZ144, Art-085 and Art-175.** Both Artilysins and  
3 endolysin KZ144 do not show significant differences in secondary structure.

4

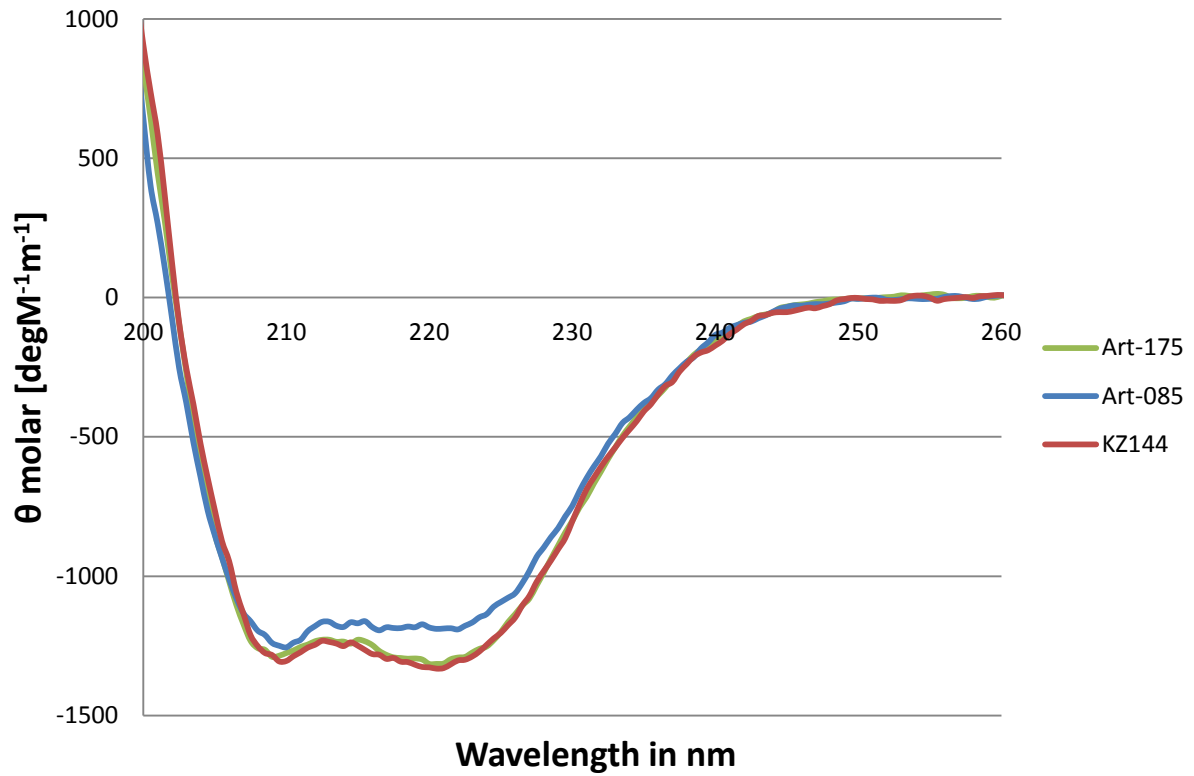

5

6

7 **Figure S1B: SDS-PAGE with Art-085 and Art-175 under reducing and non-reducing**  
8 **conditions.** Lane 1: Art-085 without  $\beta$ -mercapto-ethanol. Lane 2: Art-085 with  $\beta$ -mercapto-  
9 ethanol. Lane 3: Art-175 without  $\beta$ -mercapto-ethanol. Lane 4: Art-175 with  $\beta$ -mercapto-  
10 ethanol. Left marker: PageRuler (Thermo Scientific). Right marker: Low Molecular Weight  
11 Marker (GE Healthcare)

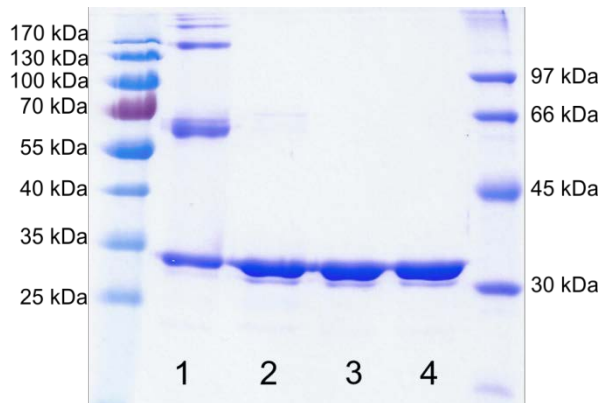

12

13

14 **Figure S1C: Normalized CD ellipticity at 220 nm in function of temperature.** Changes in  
15 secondary structure ( $\alpha$ -helices) of Art-085 (squares) and Art-175 (diamonds) are recorded  
16 during heating from 25°C to 65°C.  $T_m$  of Art-085 (44.2°C) is lower than  $T_m$  of Art-175  
17 (50.3°C), and Art-175 unfolds more cooperatively.

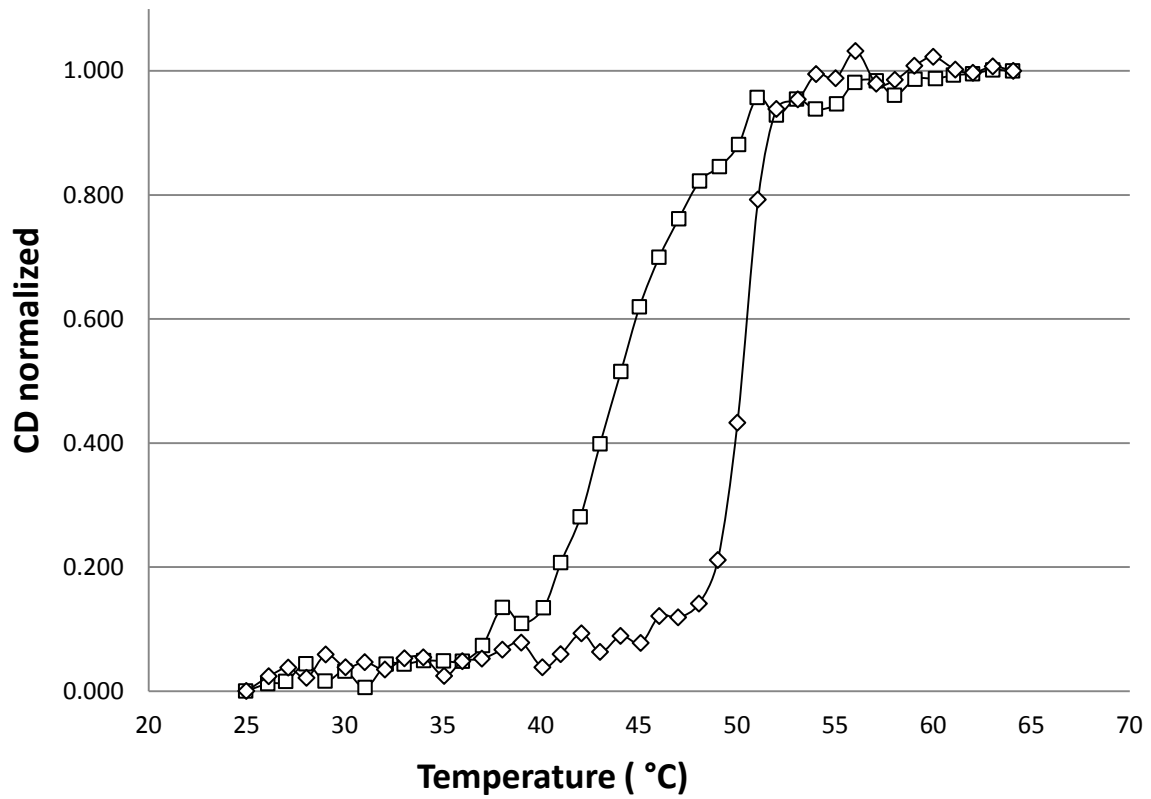

18

19

20 **Figure S1D: Thermal aggregation curves of Art-085 and Art-175.** Thermally induced  
21 aggregation of Art-085 (squares) and Art-175 (diamonds) is recorded by measurement of  
22 scattered length by absorption at 360 nm. Aggregation of Art-085 occurs at a lower  
23 temperature than for Art-175.

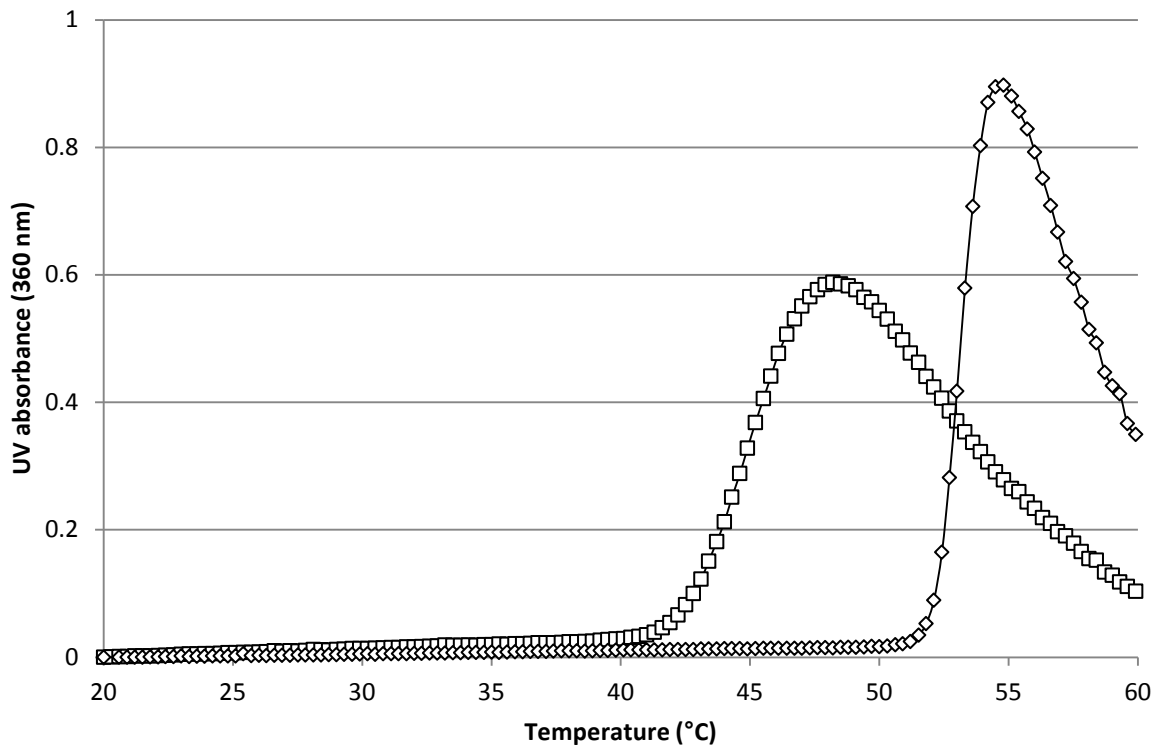

24

25

Commentary to Report N° 1308.1214

The following remarks are not part of the study report. They may only be considered as additional information for the sponsor without responsibility. This commentary is valid without a signature.

Notice

In compliance with EN ISO 10993-5:2009 one specimen of the test item was tested in-vitro for cytotoxicity. Therefor L-929 cells were cultured as monolayer (6th split of DSMZ culture: DSM ACC2, mouse connective tissue fibroblasts clone of strain L). The culture medium (RPMI 1640, lot 1376274) was supplemented with 10% v/v fetal bovine serum (FBS, lot 1159166) and 100 U/ml penicillin and 100 µg/ml streptomycin (lot 1252676). All compounds were purchased from Life Technologies (Invitrogen) GmbH, Darmstadt. The sample was tested diluted 1:5, 1:10, 1:20 and 1:40 in cell culture medium, and was incubated with the cells for two days. Thereafter the degree of cell destruction was evaluated using microscopy and subsequent viability staining (MTT). The suitability of the test system was confirmed by positive and negative controls.

| Sample-No. | Test Item                                                    | Quantitative Evaluation<br>% viability (ISO) | Qualitative Evaluation<br>reactivity grade (USP) |
|------------|--------------------------------------------------------------|----------------------------------------------|--------------------------------------------------|
| 1308.1214  | Proteinlösung Art-175,<br>5.17 mg/ml in 1xPBS+0.01% Tween 20 | 93+/- 1.4 %                                  | 0 (no reactivity)                                |

**Microscopy/Qualitative Evaluation:** Not more than 10% of the cells were round and showed discrete intracytoplasmic granules (corresponding to no reactivity), no cell lysis and empty areas were observed.

**Quantitative Evaluation:** A sample with a cell viability above 90% is considered to be **NON CYTOTOXIC**.

**Qualitative:** The extract resulted in cell reactivities that characterize the sample to comply with USP<87>.

**SUMMARY:** The sample is considered to be **NON CYTOTOXIC**.

|                              |                                      |                                      |
|------------------------------|--------------------------------------|--------------------------------------|
| Zwisler Laboratorium GmbH    | TEL 0049 7531 99 11 00               | BANK DATA BLZ 69050001 Konto 69948   |
| Register Freiburg HRB 381817 | FAX 0049 7531 99 11 01               | SWIFT Sparkasse Bodensee SOLADES1KNZ |
| Blarerstraße 56              | E-MAIL info@zwisler-laboratorium.com | Marktstätte 1 78462 Konstanz Germany |
| 78462 Konstanz               | URL www.zwisler-laboratorium.com     | VAT DE214544148                      |

27

28

29

30

31

32

33 **Figure S3: Bactericidal effect of SMAP-29, KZ144, Art-085 and Art-175 against**  
34 ***Staphylococcus DSM 346*.** A cell suspension was treated with equimolar amounts of SMAP-  
35 29, KZ144, Art-085 and Art-175 (3  $\mu$ M) in the absence and presence of 0.125 and 0.5 mM  
36 EDTA. Bacterial reduction after 1h is expressed in log<sub>10</sub> relative to the untreated control.  
37 Mean values ( $\pm$ SD) are shown. Detection limit was 4.88 log.

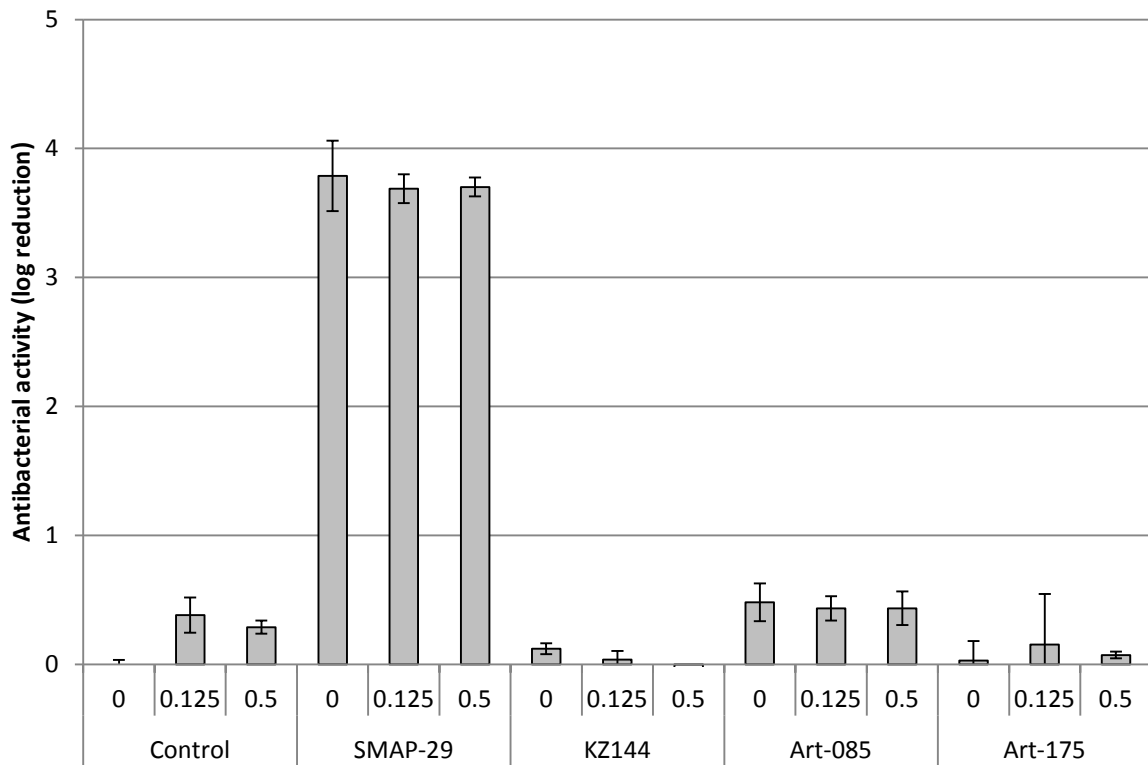

38

39

**Table S1: MIC values of Art-085 and Art-175 against *P. aeruginosa* isolates.** A panel of 79 *P. aeruginosa* isolates from diverse sources was used to analyze the MICs for Art-085 and Art-175 in the presence of 0.5 mM EDTA. The clinical (C) or environmental (E) origin is indicated. n.d. = not determined. MDR = multidrug-resistance or the number of resistances according to Table S2.

| Strain     | MIC ( $\mu\text{g/ml}$ ) |         | Clinical/<br>Environmental | MDR* | Source                                                                      | Source          |                 |
|------------|--------------------------|---------|----------------------------|------|-----------------------------------------------------------------------------|-----------------|-----------------|
|            | Art-085                  | Art-175 |                            |      |                                                                             |                 |                 |
| Br776      | 5                        | 4       | C                          | 16   | Pirnay et al., 2002a                                                        | patient isolate | throat          |
| LiCC7      | 4                        | 4       |                            |      | Lisando GmbH                                                                | unknown         |                 |
| 2575       | 9                        | 4       | C                          |      | Prof. Gessner, Medical Microbiology University Regensburg, Germany          | patient isolate |                 |
| 2747       | 4                        | 4       | C                          |      | Prof. Gessner, Medical Microbiology University Regensburg, Germany          | patient isolate |                 |
| 2572       | 8                        | 4       | C                          |      | Prof. Gessner, Medical Microbiology University Regensburg, Germany          | patient isolate |                 |
| 03.07-1.61 | 8                        | 4       | C                          |      | Prof. Gessner, Medical Microbiology University Regensburg, Germany          | patient isolate |                 |
| 03.10-181  | 6                        | 4       | C                          |      | Prof. Gessner, Medical Microbiology University Regensburg, Germany          | patient isolate |                 |
| 03.09-014  | 4                        | 4       | C                          |      | Prof. Gessner, Medical Microbiology University Regensburg, Germany          | patient isolate |                 |
| 03.09.177  | 6                        | 4       | C                          |      | Prof. Gessner, Medical Microbiology University Regensburg, Germany          | patient isolate |                 |
| 03.08-704  | 12                       | 4       | C                          |      | Prof. Gessner, Medical Microbiology University Regensburg, Germany          | patient isolate |                 |
| Br257      | 4                        | 4       | E                          | 8    | Pirnay et al., 2002a                                                        | plant           | rhizosphere     |
| CFA        | 12.5                     | 4       |                            |      | Military Hospital Nederoverheembeek, Brussels, Belgium                      | unknown         |                 |
| GHb15      | 7                        | 4       | C                          |      | Prof. J. Verhaegen, UZ Gasthuisberg, Leuven, Belgium                        | patient isolate |                 |
| Krylov     | 7                        | 4       | C                          |      | Prof. V. Krylov, Mechnikov Research Institute for Vaccines and Sera, Russia | patient isolate | stool sample    |
| Bo546      | 12.5                     | 4       | C                          | 16   | Pirnay et al., 2002a                                                        | patient isolate | burn wound      |
| Bo548      | 8                        | 4       | C                          | 12   | Pirnay et al., 2002a                                                        | patient isolate | burn wound      |
| Br908      | 6                        | 4       | C                          | 9    | Pirnay et al., 2002a                                                        | patient isolate | throat          |
| Bu004      | 8                        | 4       | C                          | 9    | Pirnay et al., 2002a                                                        | patient isolate | throat          |
| Bu007      | 16                       | 4       | C                          |      | Pirnay et al., 2002a                                                        | patient isolate | burn wound      |
| C          | 4                        | 4       | C                          | 10   | Pirnay et al., 2002a                                                        | patient isolate | cystic fibrosis |

|            |      |   |   |                |                                                                    |                      |                                        |
|------------|------|---|---|----------------|--------------------------------------------------------------------|----------------------|----------------------------------------|
| C17        | 7    | 4 | E | 9              | Pirnay et al., 2002a                                               | hospital environment |                                        |
| Is580      | 5    | 4 | C | 15             | Pirnay et al., 2002a                                               | patient isolate      | burn wound                             |
| LMG2107    | 12.5 | 4 | E | 9              | Pirnay et al., 2002a                                               | shallow well         |                                        |
| LMG5031    | 5    | 4 | E | 9              | Pirnay et al., 2002a                                               | Chinese evergreen    |                                        |
| LMG14083   | 9    | 4 | E |                | Pirnay et al., 2002a                                               | unknown              |                                        |
| SG17M      | 5    | 4 | E |                | Pirnay et al., 2002a                                               | river water          |                                        |
| So099      | 12.5 | 4 | C |                | Pirnay et al., 2002a                                               | patient isolate      | burn wound                             |
| US449      | 4    | 4 | C | 9              | Pirnay et al., 2002a                                               | patient isolate      | sputum                                 |
| C13        | 4    | 4 | C |                | Pirnay et al., 2002a                                               | patient isolate      | cystic fibrosis                        |
| Lo053      | 9    | 4 | C |                | Pirnay et al., 2002b                                               | patient isolate      | burn wound                             |
| Alexis3    | 6    | 4 | C |                | Lisando GmbH                                                       | dog                  | otitis                                 |
| ATCC 27853 | 7.5  | 4 | C |                | Prof. Gessner, Medical Microbiology University Regensburg, Germany | unknown              |                                        |
| MH57       | 9    | 4 | C | multiresistant | Prof. Schobert, Technical University Braunschweig, Germany         | patient isolate      | urinary tract infection                |
| GH06_25135 | <5   | 4 | C |                | Prof. Schobert, Technical University Braunschweig, Germany         | patient isolate      | chronic wound infection                |
| BT73       | 8    | 4 | C |                | Prof. Schobert, Technical University Braunschweig, Germany         | patient isolate      | chronic lung infection/cystic fibrosis |
| 11161      | 4    | 4 |   |                | Prof. Tateda, University Toho, Tokyo, Japan                        | unknown              |                                        |
| 11159      | 6    | 4 |   |                | Prof. Tateda, University Toho, Tokyo, Japan                        | unknown              |                                        |
| 11170      | 4    | 4 |   |                | Prof. Tateda, University Toho, Tokyo, Japan                        | unknown              |                                        |
| Colja 6    | 8    | 4 | C |                | Lisando GmbH                                                       | dog                  | otitis                                 |
| va32824_2  | n.d. | 4 | C |                | Lisando GmbH                                                       | patient isolate      | inguinal region                        |
| va4672     | n.d. | 4 | C |                | Lisando GmbH                                                       | dog                  | otitis                                 |
| va49882    | n.d. | 4 | C |                | Lisando GmbH                                                       | dog                  | otitis                                 |
| PAO1       | 5    | 5 | C | 9              | Pirnay et al., 2002a (laboratory reference strain)                 | patient isolate      | stool sample                           |
| Br667      | >20  | 6 | C | 19             | Pirnay et al., 2002a                                               | patient isolate      | burn wound                             |
| 2573       | 6    | 6 | C |                | Prof. Gessner, Medical Microbiology University Regensburg, Germany | patient isolate      |                                        |
| Be136      | 12.5 | 6 | C | 9              | Pirnay et al., 2002a                                               | patient isolate      | sputum                                 |
| Bo559      | 15   | 6 | C |                | Pirnay et al., 2002a                                               | patient isolate      | burn wound                             |
| Br229      | >15  | 6 | E | 18             | Pirnay et al., 2002a                                               | hospital             |                                        |



| Strain        | CFU  | Days | Site | Resistance     | Source                                                             | Environment | Specimen                                |
|---------------|------|------|------|----------------|--------------------------------------------------------------------|-------------|-----------------------------------------|
| Br906         | 12.5 | 6    | C    | 9              | Pirnay et al., 2002a                                               | environment | patient isolate nose                    |
| Is573         | >15  | 6    | C    | 19             | Pirnay et al., 2002a                                               | environment | patient isolate burn wound              |
| Li004         | >15  | 6    | C    |                | Pirnay et al., 2002a                                               | environment | patient isolate cystic fibrosis         |
| PhDW6         | 7.5  | 6    | C    |                | Pirnay et al., 2002a                                               | environment | patient isolate wound                   |
| Pr335         | >15  | 6    | E    |                | Pirnay et al., 2002a                                               | environment | hospital environment                    |
| TuD199        | >15  | 6    | C    |                | Pirnay et al., 2002a                                               | environment | patient isolate sputum                  |
| PAK           | 9    | 6    | E    |                | Prof. L. Debarbieux, Institut Pasteur, Paris, France               | environment | unknown                                 |
| Bobby 6       | 8    | 6    | C    |                | Lisando GmbH                                                       | environment | dog otitis                              |
| MH39          | 15   | 6    | C    | multiresistant | Prof. Schobert, Technical University Braunschweig, Germany         | environment | patient isolate urinary tract infection |
| GH06_41910    | <5   | 6    | C    |                | Prof. Schobert, Technical University Braunschweig, Germany         | environment | patient isolate chronic wound infection |
| va32872_1     | n.d. | 6    | C    |                | Lisando GmbH                                                       | environment | patient isolate nose                    |
| 3-8 1.68      | 4    | 8    | C    |                | Prof. Gessner, Medical Microbiology University Regensburg, Germany | environment | patient isolate                         |
| K             | 9    | 8    |      |                | Military Hospital Nederoverheembeek, Brussels, Belgium             | environment | unknown                                 |
| US448         | 15   | 8    | C    | 9              | Pirnay et al., 2002a                                               | environment | patient isolate urine                   |
| Br680         | 10   | 8    | C    | 9              | Pirnay et al., 2002a                                               | environment | patient isolate burn wound              |
| PA6           | 10   | 8    | C    | 13             | Pirnay et al., 2002a                                               | environment | patient isolate urine                   |
| PAO23         | >15  | 8    | E    |                | Pirnay et al., 2002a                                               | environment | river water                             |
| PT31M         | 8    | 8    | E    |                | Pirnay et al., 2002a                                               | environment | drinking water                          |
| 11177         | 12   | 8    |      |                | Prof. Tateda, University Toho, Tokyo, Japan                        | environment | unknown                                 |
| B10-03.07.159 | 4    | 10   | C    |                | Prof. Gessner, Medical Microbiology University Regensburg, Germany | environment | patient isolate                         |
| Aa249         | >15  | 10   | C    |                | Pirnay et al., 2002a                                               | environment | patient isolate burn wound              |
| Be128         | 15   | 10   | C    | 9              | Pirnay et al., 2002a                                               | environment | patient isolate sputum                  |
| Li009         | 13   | 10   | C    | 8              | Pirnay et al., 2002a                                               | environment | patient isolate cystic fibrosis         |
| Aa245         | >15  | 12   | C    |                | Pirnay et al., 2002b                                               | environment | patient isolate burn wound              |
| Bobby 5       | 6    | 12   | C    |                | Lisando GmbH                                                       | environment | dog otitis                              |
| B11-09.07.229 | 20   | 12   | C    |                | Prof. Gessner, Medical Microbiology University Regensburg, Germany | environment | patient isolate cystic fibrosis         |
| ur08107       | n.d. | 20   | C    |                | Prof. Gessner, Medical Microbiology University Regensburg          | environment | patient isolate urinary tract infection |

|       |     |    |   |                |                                                            |                                         |
|-------|-----|----|---|----------------|------------------------------------------------------------|-----------------------------------------|
| Tu843 | 15  | 22 |   |                | Military Hospital Nederoverheembeek, Brussels, Belgium     | unknown                                 |
| 11178 | 12  | 22 |   |                | Prof. Tateda, University Toho, Tokyo, Japan                | unknown                                 |
| MH27  | >20 | 24 | C | multiresistant | Prof. Schobert, Technical University Braunschweig, Germany | patient isolate urinary tract infection |
| 1631  | 20  | 28 |   |                | Prof. Tateda, University Toho, Tokyo, Japan                | unknown                                 |

---

**Table S2: Comparison of MIC-values for Art-175 and commonly used antibiotics against a panel of clinical MDR *P. aeruginosa* isolates.**

The MIC of Art-175 (in  $\mu\text{g/ml}$ ) was determined for *P. aeruginosa* PAO1 and 24 clinical and environmental isolates in Mueller-Hinton medium with 0.5 mM EDTA. Art-175 was dialyzed against 20 mM HEPES 0.5 M NaCl pH 7.4 and tested at a concentration between 4 and 15  $\mu\text{g/ml}$ . Plates were incubated for 18h at 37°C. In addition, the susceptibility (in  $\mu\text{g}/\mu\text{l}$ ; S = sensitive (green), I = intermediate (yellow) and R = resistant (red)) of these strains for 12 therapeutically used antibiotics was indicated, using the CLSI breakpoint system (CLSI M100-S24): PIP = piperacillin, TZP = piperacillin + tazobactam, CTX = cefotaxime; CAZ = ceftazidime, FEP = cefepime, MEM = meropenem, AMK = amikacin, GEN = gentamicin, TOB = tobramycin, CIP = ciprofloxacin, NOR = norfloxacin, OFX = ofloxacin. The different strains are ranked according to the number of resistances. Averages of (at least) three repeats are presented here.

## MIC (µg/ml)

| Art-175  | Antibiotics |          |          |         |         |         |           |         |         |         |           |          |           |
|----------|-------------|----------|----------|---------|---------|---------|-----------|---------|---------|---------|-----------|----------|-----------|
|          | PIP         | TZP      | CTX      | CAZ     | FEP     | MEM     | AMK       | GEN     | TOB     | CIP     | NOR       | OFX      |           |
| Br667    | 6           | ≥128 (R) | ≥128 (R) | ≥64 (R) | 8 (S)   | 32 (R)  | 2 (S)     | ≥64 (R) | ≥16 (R) | ≥16 (R) | ≥4 (R)    | ≥16 (R)  | ≥8 (R)    |
| Is573    | 6           | ≥128 (R) | ≥128 (R) | ≥64 (R) | 16 (I)  | ≥64 (R) | ≥16 (R)   | ≥64 (R) | ≥16 (R) | 4 (S)   | ≥4 (R)    | ≥16 (R)  | ≥8 (R)    |
| Br229    | 6           | ≥128 (R) | ≥128 (R) | ≥64 (R) | 4 (S)   | 8 (S)   | 1 (S)     | ≥64 (R) | ≥16 (R) | ≥16 (R) | ≥4 (R)    | ≥16 (R)  | ≥8 (R)    |
| Br776    | 4           | ≥128 (R) | ≥128 (R) | ≥64 (R) | ≥64 (R) | 32 (R)  | ≥16 (R)   | 16 (S)  | 4 (S)   | ≤1 (S)  | 2 (I)     | 8 (I)    | ≥8 (R)    |
| Bo546    | 4           | ≥128 (R) | 64 (S)   | ≥64 (R) | ≥64 (R) | ≥64 (R) | ≤0,25 (S) | ≥64 (R) | ≥16 (R) | ≥16 (R) | ≤0,25 (S) | ≤0,5 (S) | 1 (S)     |
| Is580    | 4           | ≥128 (R) | 64 (S)   | ≥64 (R) | 32 (R)  | 4 (S)   | 1 (S)     | ≤2 (S)  | ≥16 (R) | ≥16 (R) | 2 (I)     | 4 (S)    | ≥8 (R)    |
| Pa6      | 8           | ≥128 (R) | ≥128 (R) | 32 (I)  | 4 (S)   | 8 (S)   | ≤0,25 (S) | ≤2 (S)  | ≥16 (R) | ≥16 (R) | 0.5 (S)   | ≤0,5 (S) | 1 (S)     |
| Bo548    | 8           | ≥128 (R) | 64 (S)   | ≥64 (R) | 32 (R)  | 8 (S)   | 2 (S)     | 8 (S)   | 4 (S)   | ≤1 (S)  | ≤0,25 (S) | 1 (S)    | 2 (S)     |
| C        | 4           | ≤4 (S)   | ≤4 (S)   | 8 (S)   | 4 (S)   | 8 (S)   | ≤0,25 (S) | 4 (S)   | ≥16 (R) | 8 (I)   | 1 (S)     | 2 (S)    | 4 (I)     |
| Li012    | 8           | ≤4 (S)   | ≤4 (S)   | 4 (S)   | 2 (S)   | ≤1 (S)  | ≤0,25 (S) | ≤2 (S)  | ≤1 (S)  | ≤1 (S)  | 2 (I)     | 4 (S)    | ≥8 (R)    |
| Us449    | 4           | 8 (S)    | 8 (S)    | 32 (I)  | 4 (S)   | 2 (S)   | 1 (S)     | 4 (S)   | 2 (S)   | ≤1 (S)  | ≤0,25 (S) | ≤0,5 (S) | 2 (S)     |
| Us448    | 8           | ≤4 (S)   | ≤4 (S)   | 32 (I)  | 4 (S)   | 2 (S)   | ≤0,25 (S) | 4 (S)   | 2 (S)   | ≤1 (S)  | ≤0,25 (S) | ≤0,5 (S) | 1 (S)     |
| Be128    | 10          | 8 (S)    | 8 (S)    | 32 (I)  | 4 (S)   | 2 (S)   | 4 (S)     | ≤2 (S)  | 2 (S)   | ≤1 (S)  | ≤0,25 (S) | ≤0,5 (S) | 1 (S)     |
| Br908    | 4           | 8 (S)    | 8 (S)    | 32 (I)  | 4 (S)   | 2 (S)   | 1 (S)     | ≤2 (S)  | ≤1 (S)  | ≤1 (S)  | 0.5 (S)   | ≤0,5 (S) | 2 (S)     |
| Bu004    | 4           | ≤4 (S)   | ≤4 (S)   | 16 (I)  | ≤1 (S)  | ≤1 (S)  | 0.5 (S)   | ≤2 (S)  | ≤1 (S)  | ≤1 (S)  | ≤0,25 (S) | ≤0,5 (S) | 2 (S)     |
| C18      | 6           | ≤4 (S)   | ≤4 (S)   | 16 (I)  | ≤1 (S)  | ≤1 (S)  | ≤0,25 (S) | ≤2 (S)  | ≤1 (S)  | ≤1 (S)  | ≤0,25 (S) | ≤0,5 (S) | 1 (S)     |
| PAO1     | 6           | ≤4 (S)   | ≤4 (S)   | 16 (I)  | 2 (S)   | 2 (S)   | ≤0,25 (S) | ≤2 (S)  | ≤1 (S)  | ≤1 (S)  | ≤0,25 (S) | ≤0,5 (S) | 1 (S)     |
| LMG 5031 | 5           | 8 (S)    | 8 (S)    | 32 (I)  | 2 (S)   | 2 (S)   | ≤0,25 (S) | ≤2 (S)  | ≤1 (S)  | ≤1 (S)  | ≤0,25 (S) | ≤0,5 (S) | 0.5 (S)   |
| LMG 2107 | 4           | ≤4 (S)   | ≤4 (S)   | 16 (I)  | 2 (S)   | ≤1 (S)  | ≤0,25 (S) | ≤2 (S)  | ≤1 (S)  | ≤1 (S)  | ≤0,25 (S) | ≤0,5 (S) | 1 (S)     |
| Be136    | 6           | 8 (S)    | 8 (S)    | 32 (I)  | 4 (S)   | 2 (S)   | ≤0,25 (S) | ≤2 (S)  | ≤1 (S)  | ≤1 (S)  | ≤0,25 (S) | ≤0,5 (S) | 1 (S)     |
| Br906    | 6           | 8 (S)    | 8 (S)    | 32 (I)  | 4 (S)   | 2 (S)   | ≤0,25 (S) | ≤2 (S)  | ≤1 (S)  | ≤1 (S)  | ≤0,25 (S) | ≤0,5 (S) | 1 (S)     |
| C17      | 4           | ≤4 (S)   | ≤4 (S)   | 8 (S)   | ≤1 (S)  | ≤1 (S)  | ≤0,25 (S) | ≤2 (S)  | ≤1 (S)  | ≤1 (S)  | ≤0,25 (S) | ≤0,5 (S) | 1 (S)     |
| Br680    | 8           | ≤4 (S)   | ≤4 (S)   | 4 (S)   | ≤1 (S)  | ≤1 (S)  | ≤0,25 (S) | ≤2 (S)  | ≤1 (S)  | ≤1 (S)  | ≤0,25 (S) | ≤0,5 (S) | 0.5 (S)   |
| Br257    | 4           | ≤4 (S)   | ≤4 (S)   | 8 (S)   | ≤1 (S)  | ≤1 (S)  | ≤0,25 (S) | ≤2 (S)  | ≤1 (S)  | ≤1 (S)  | ≤0,25 (S) | ≤0,5 (S) | ≤0,25 (S) |
| Li009    | 10          | ≤4 (S)   | ≤4 (S)   | 4 (S)   | 4 (S)   | ≤1 (S)  | ≤0,25 (S) | 4 (S)   | 2 (S)   | ≤1 (S)  | ≤0,25 (S) | ≤0,5 (S) | 0.5 (S)   |

**Table S3: MIC values of Art-085 and Art-175 against a broad panel of bacterial species.** Gram-negative species belonging to the families Pseudomonadaceae, Enterobacteriaceae and Bacteroidaceae, and diverse Gram-positive species were tested for their susceptibility to up to at least 20 µg/ml Art-085 and Art-175 in the absence of EDTA. Growth conditions and source of the strains are indicated.

| Species                         | Strain       | MIC (µg/ml) |         | Growth conditions | Source                                                                   |
|---------------------------------|--------------|-------------|---------|-------------------|--------------------------------------------------------------------------|
|                                 |              | Art-085     | Art-175 |                   |                                                                          |
| <b>Gram-negative species</b>    |              |             |         |                   |                                                                          |
| Pseudomonads                    |              |             |         |                   |                                                                          |
| <i>Pseudomonas aeruginosa</i>   | PAO1         | 18          | 10      | 37°C (18h)        | Pirnay et al., 2002a (Laboratory reference strain)                       |
| <i>Pseudomonas aeruginosa</i>   | GHb15        | 12          | 10      | 37°C (18h)        | Prof. J. Verhaegen, UZ Gasthuisberg, Leuven, Belgium                     |
| <i>Pseudomonas aeruginosa</i>   | SG17M        | 7.5         | 7.5     | 37°C (18h)        | Pirnay et al., 2002a                                                     |
| <i>Pseudomonas aeruginosa</i>   | Alexis3      | 16          | 7.5     | 37°C (18h)        | Lisando GmbH                                                             |
| <i>Pseudomonas aeruginosa</i>   | FRDI         | 10          | 7.5     | 37°C (18h)        | Prof. M. Schobert, Technical University Braunschweig, Germany            |
| <i>Pseudomonas aeruginosa</i>   | 11160        | 7.5         | 5       | 37°C (18h)        | Prof. K. Tateda, University of Toho, Tokyo, Japan                        |
| <i>Pseudomonas putida</i>       | RD3SR1       | 18          | 16      | 37°C (18h)        | Prof. R. De Mot, Centre of Microbial and plant genetics, Leuven, Belgium |
| <i>Pseudomonas putida</i>       | RW1P1        | 20          | 18      | 37°C (18h)        | Prof. R. De Mot, Centre of Microbial and plant genetics, Leuven, Belgium |
| <i>Pseudomonas putida</i>       | RW1P2        | 20          | 18      | 37°C (18h)        | Prof. R. De Mot, Centre of Microbial and plant genetics, Leuven, Belgium |
| <i>Pseudomonas putida</i>       | RW5P2        | 20          | 18      | 37°C (18h)        | Prof. R. De Mot, Centre of Microbial and plant genetics, Leuven, Belgium |
| <i>Pseudomonas syringae</i>     | DSM 50281    | 5           | 5       | 30°C (18h)        | German Collection of Microorganisms and Cell Cultures                    |
| <i>Pseudomonas syringae</i>     | DSM 10604    | 7.5         | 7.5     | 30°C (18h)        | German Collection of Microorganisms and Cell Cultures                    |
| Enterobacteriaceae              |              |             |         |                   |                                                                          |
| <i>Escherichia coli</i> O26:H11 | RKI 07-05313 | >20         | >20     | 37°C (18h)        | Dr. A. Fruth, Robert Koch Institute, Wernigerode, Germany                |
| <i>Escherichia coli</i> O103:H2 | RKI 06-08410 | >20         | >20     | 37°C (18h)        | Dr. A. Fruth, Robert Koch Institute, Wernigerode, Germany                |
| <i>Escherichia coli</i> O111:H- | 09-06443     | >20         | >20     | 37°C (18h)        | Dr. A. Fruth, Robert Koch Institute, Wernigerode, Germany                |
| <i>Escherichia coli</i> O145:H- | 06-05741     | >20         | >20     | 37°C (18h)        | Dr. A. Fruth, Robert Koch Institute, Wernigerode, Germany                |
| <i>Escherichia coli</i> O157:H7 | RKI 03-07953 | >20         | >20     | 37°C (18h)        | Dr. A. Fruth, Robert Koch Institute, Wernigerode, Germany                |
| <i>Salmonella</i> Typhimurium   | DSM 17058    | >20         | >20     | 37°C (18h)        | German Collection of Microorganisms and Cell Cultures                    |

|                                                   |                |     |     |                             |                                                                    |
|---------------------------------------------------|----------------|-----|-----|-----------------------------|--------------------------------------------------------------------|
| <i>Salmonella</i> Enteritidis                     | DSM 17420      | 14  | >20 | 37°C (18h)                  | German Collection of Microorganisms and Cell Cultures              |
| <i>Proteus mirabilis</i>                          | B12-11.20.0190 | >20 | >20 | 37°C (18h)                  | Prof. Gessner, Medical Microbiology University Regensburg, Germany |
| <i>Klebsiella pneumoniae</i>                      | ATCC 13883     | 7.5 | 10  | 37°C (18h)                  | ATCC                                                               |
| <b>Bacteroidaceae</b>                             |                |     |     |                             |                                                                    |
| <i>Bacteroides fragilis</i>                       | DSM 2151       | >20 | >20 | 37°C (20h), anaerobic       | German Collection of Microorganisms and Cell Cultures              |
| <i>Bacteroides fragilis</i>                       | DSM 9669       | >20 | >20 | 37°C (20h), anaerobic       | German Collection of Microorganisms and Cell Cultures              |
| <b>Gram-positive species</b>                      |                |     |     |                             |                                                                    |
| <i>Staphylococcus aureus</i>                      | DSMZ 346       | >20 | >20 | 37°C (18h)                  | German Collection of Microorganisms and Cell Cultures              |
| <i>Staphylococcus epidermidis</i>                 | DSM 20041      | >20 | >20 | 37°C (18h)                  | German Collection of Microorganisms and Cell Cultures              |
| <i>Streptococcus pneumoniae</i>                   | DSM 14378      | >20 | >20 | 37°C (20h), microaerophilic | German Collection of Microorganisms and Cell Cultures              |
| <i>Listeria monocytogenes</i>                     | DSMZ 15675     | >20 | >20 | 37°C (18h)                  | German Collection of Microorganisms and Cell Cultures              |
| <i>Bacillus subtilis</i> subsp. <i>spizizenii</i> | DSM 347        | >20 | >20 | 37°C (18h)                  | German Collection of Microorganisms and Cell Cultures              |
| <i>Enterococcus faecalis</i>                      | DSM 6134       | >20 | >20 | 37°C (20h), microaerophilic | German Collection of Microorganisms and Cell Cultures              |
| <i>Clostridium perfringens</i>                    | DSM 756        | >20 | >20 | 37°C (20h), anaerobic       | German Collection of Microorganisms and Cell Cultures              |
| <b>Yeast</b>                                      |                |     |     |                             |                                                                    |
| <i>Candida albicans</i>                           | DSM 1386       | >20 | >20 | 25°C (40h)                  | German Collection of Microorganisms and Cell Cultures              |

## References

1. **Pirnay J-P, De Vos D, Cochez C, Bilocq F, Vanderkelen A, Zizi M, Ghysels B, Cornelis P.** 2002a. *Pseudomonas aeruginosa* displays an epidemic population structure. *Environ. Microbiol.* **4**:898-911.
2. **Pirnay J-P, De Vos D, Mossialos D, Vanderkelen A, Cornelis P, Zizi M.** 2002b. Analysis of the *Pseudomonas aeruginosa oprD* gene from clinical and environmental isolates. *Environ. Microbiol.* **4**:872-882.
